- following caudal injection in children. *Br J Anaesth* 49:1027-1034, 1977
3. Takasaki M, Dohi S, Kawabata Y, Takahashi T: Dosage of lidocaine for caudal anesthesia in infants and children. *ANESTHESIOLOGY* 47:527-529, 1977
  4. Armitage EN: Caudal block in children. *Anaesthesia* 34:396, 1979
  5. Satoyoshi M, Kamiyama Y: Caudal anaesthesia for upper abdominal surgery in infants and children: A simple calculation of the volume of local anaesthetic. *Acta Anaesthesiol Scand* 28:57-60, 1984
  6. Arthur DS, McNicol LR: Local anaesthetic techniques in paediatric surgery. *Br J Anaesth* 58:760-778, 1986
  7. Kapsten JE, Broadman LM, Hannallah RS, Norrie WC, Mundy GL, Belman AB, Anderson KD, Guzetta PC: Is there an optimum concentration of bupivacaine for caudal analgesia in outpatient surgery for children? *Can Anaesth Soc J* 33:S114, 1986
  8. Vater M, Wandless J: Caudal or dorsal nerve block? A comparison of two local anaesthetic techniques for postoperative analgesia following day case circumcision. *Acta Anaesthesiol Scand* 29:175-179, 1985
  9. Scott DB, Cousins MJ: Clinical pharmacology of local anesthetic agents, Neural Blockade. Edited by Cousins MJ, Bridenbaugh PO. Philadelphia, J. B. Lippincott Company, 1980, pp 80-121
  10. Warner MA, Kunkel SE, Dawson B, Atchison SR: The effects of age and the addition of epinephrine to bupivacaine for caudal analgesia in pediatric patients. *ANESTHESIOLOGY* 63:A464, 1985
  11. Hannallah RS, Broadman LM, Belman AB, Abramowitz MD, Epstein BS: Comparison of caudal and ilioinguinal/iliohypogastric nerve blocks for control of post-orchidopexy pain in pediatric ambulatory surgery. *ANESTHESIOLOGY* 66:832-834, 1987
  12. Cohen J: Statistical Power Analysis for the Behavioural Sciences, Revised edition. Orlando, Academic Press Inc., 1977, pp 179-183, 204-207
  13. Zar JH: Biostatistical Analysis, 2nd edition. Englewood Cliffs, Prentice-Hall, 1982, pp 160-171, 190-192, 529, 653-656
  14. Fortuna A: Caudal analgesia: A simple and safe technique in pediatric surgery. *Br J Anaesth* 39:165-170, 1967
  15. McGown RG: Caudal analgesia in children. Five hundred cases for procedures below the diaphragm. *Anaesthesia* 37:806-818, 1982
  16. Matsumiya N, Dohi S, Takahashi H, Kondo Y, Naito H: Cardiovascular collapse in an infant after caudal anesthesia with a lidocaine-epinephrine solution. *Anesth Analg* 65:1074-1076, 1986
  17. Eyres RL, Bishop W, Oppenheim RC, Brown TCK: Plasma bupivacaine concentrations in children during caudal epidural analgesia. *Anaesth Intensive Care* 11:20-22, 1983
  18. Ecoffey C, Desparmett J, Maury M, Berdeaux A, Giudicelli JF, Saint-Maurice C: Bupivacaine in children: Pharmacokinetics following caudal anesthesia. *ANESTHESIOLOGY* 63:447-448, 1985

Anesthesiology  
69:106-109, 1988

## Auditory Alarms during Anesthesia Monitoring

I. G. KESTIN, F.F.A.R.C.S.,\* BLAINE R. MILLER, D.O.,\* CHARLES H. LOCKHART, M.D.†

The trend in anesthesia care is toward increasing use of technologic non-invasive monitors. The American Society of Anesthesiologists has recently published recommended standards for basic patient monitoring, which include arterial blood pressure, electrocardiography, an oxygen analyzer, and a ventilator disconnection alarm.‡ Monitors that are encouraged, but not mandatory, include pulse oximetry, capnography, and spirometry. Most monitors are fitted with alarm systems,

usually with preset and modifiable thresholds, which produce an auditory signal when a high or low limit is passed. This survey evaluates the significance of auditory alarms that sound during routine anesthetic management.

### MATERIALS AND METHODS

After institutional approval, 50 patients were studied, ASA physical status I-III, ages 1 month to 10 yr. These were all elective general surgical, ophthalmic, dental, or orthopedic cases; no patient had any significant cardiac or respiratory disease. Five monitors with auditory alarms were routinely used: electrocardiography (ECG) (Datascope® model 870, Paramus, NJ), automatic oscillometric blood pressure (BP) (Critikon Dinamap® 847, Tampa, FL), oxygen analyzer (Ohio® oxygen monitor 401, Madison, WI), pulse oximetry (Nellcor®, Hayward, CA), and ventilator low inspiratory pressure (disconnect alarm) (Ohio, Madison, WI). Non-monitoring equipment with auditory alarms commonly used included intravenous infusion pumps and electrocautery. The initial alarm limits are shown in table 1. Once one of the upper alarm limits had sounded, new upper alarm limits could be set by the anesthesiologist in charge of the case. The lower alarm limits could not be

\* Clinical Fellow in Pediatric Anesthesia.

† Director, Department of Anesthesiology, The Children's Hospital; Clinical Professor of Anesthesiology and Pediatrics, University of Colorado Health Sciences Center.

Received from the Department of Anesthesiology, The Children's Hospital, Denver, Colorado; and the Departments of Anesthesiology and Pediatrics, University of Colorado Health Sciences Center, Denver, Colorado. Accepted for publication January 12, 1988. Presented in abstract form at American Society of Anesthesiologists Annual Meeting, 1987 (A191). All work done at The Children's Hospital.

Address reprint requests to Dr. Lockhart: Director, Department of Anesthesiology, The Children's Hospital, 1056 East 19th Avenue, Denver, Colorado 80218-1088.

Key words: Equipment: auditory alarms. Monitoring: auditory alarms.

‡ American Society of Anesthesiologists Newsletter, 50:Vol 12, 12, 1986

TABLE 1. Initial Monitor Alarm Limits

|                                    | Lower Alarm Limits    | Upper Alarm Limits |
|------------------------------------|-----------------------|--------------------|
| Electrocardiogram                  | 75 bpm                | 175 bpm            |
| Pulse oximeter arterial saturation | 85%                   | 100%               |
| Pulse oximeter heart rate          | 55 bpm                | 140 bpm            |
| Mean blood pressure                | 30 mmHg               | 100 mmHg           |
| Ventilator disconnect              | 7 cm H <sub>2</sub> O |                    |
| Inspired oxygen                    | 30%                   | 100%               |

TABLE 2. Definition of Alarm Categories

| Alarm Category                  | Alarm                                                                                                                                                          |
|---------------------------------|----------------------------------------------------------------------------------------------------------------------------------------------------------------|
| Patient risk                    | Arterial oxygen saturation < 85%<br>Mean arterial blood pressure < 30 mmHg<br>ECG: heart rate < 75 bpm<br>Ventilator disconnect alarm<br>Inspired oxygen < 30% |
| Change above upper alarm limits | ECG: heart rate > upper limit<br>Pulse oximeter heart rate > upper limit<br>Mean arterial pressure > upper limit                                               |
| Spurious                        | Any alarm caused by: patient movement, interference, mechanical problems                                                                                       |

changed. An independent observer recorded all the alarms that sounded, the times at which they did so, and classified them into one of the three categories defined in table 2.

RESULTS

Seventy-five percent of all the alarms that sounded were spurious alarms, while only 3% indicated risk to the patient (fig. 1). Ninety-nine percent of all the alarms were from the pulse oximeter, ECG, or BP monitors; the only other alarms that were recorded were from intravenous infusion devices or the electrocautery

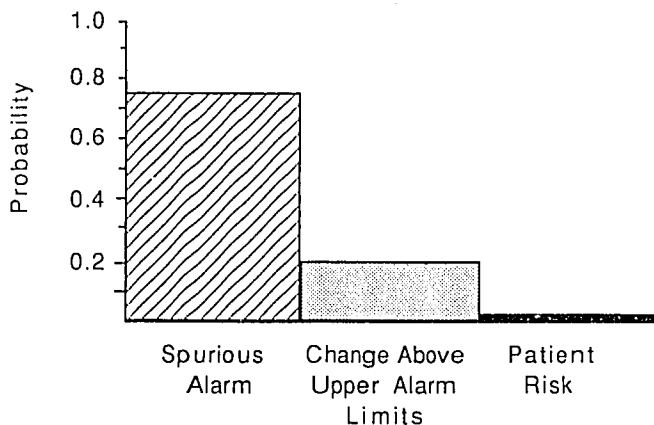

FIG. 1. The probability that an auditory alarm will be a spurious alarm, a patient risk, or a change above upper alarm limits. See table 2 for definition of these categories.

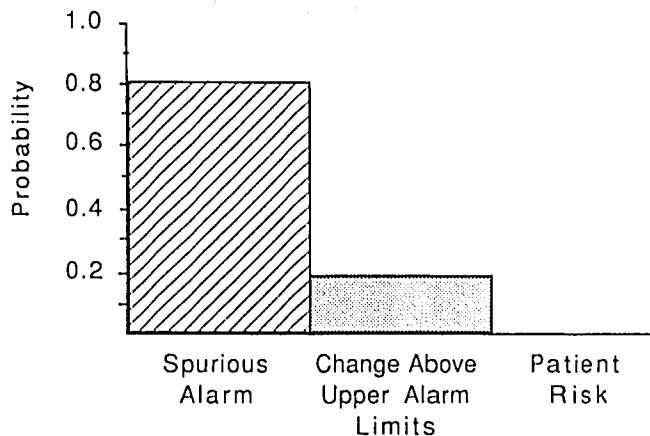

FIG. 2. The probability that an ECG alarm will be a spurious alarm, a patient risk, or a change above upper alarm limits.

grounding alarm. There were no alarms for bradycardia, hypotension, low inspired oxygen, or ventilator disconnection in this study.

There were two patterns of alarm responses from the individual monitors (figs. 2-5). The ECG and the saturation alarm on the pulse oximeter showed a pattern similar to the overall pattern, with the majority of their alarms being spurious. The BP monitor and the heart rate alarm on the pulse oximeter showed a different pattern of significance, with the majority of their alarms recorded as a change above the upper alarm limits. This, in practice, meant that the mean arterial pressure exceeded 100 mmHg or the heart rate on the pulse oximeter exceeded 140 bpm; both of these limits are automatically preset initial alarm limits of those particular monitors, both of which were exceeded relatively frequently.

The frequency with which the alarms sounded at various stages during anesthesia and surgery is shown in figure 6. A mean of ten alarms sounded per case, with a mean frequency of one alarm every 4.5 min. The main causes of spurious alarms are shown in table 3.

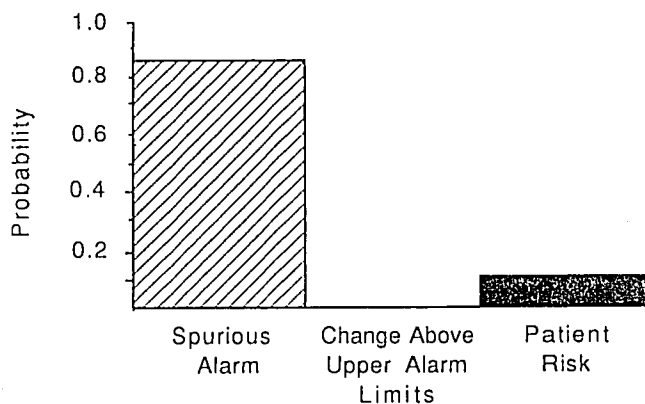

FIG. 3. The probability that a saturation alarm on the pulse oximeter will be a spurious alarm, a patient risk, or a change above upper alarm limits.

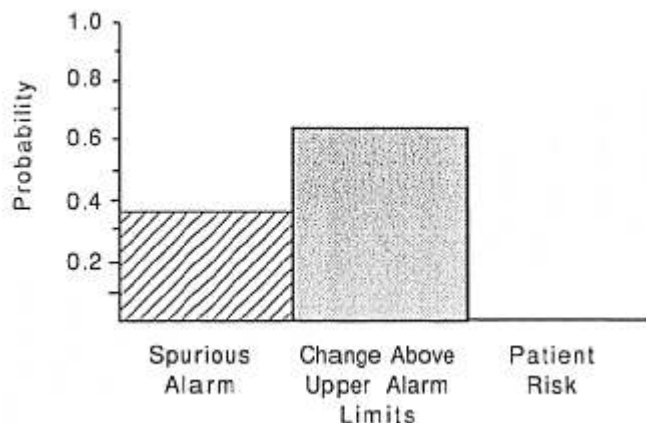

FIG. 4. The probability that a BP alarm will be a spurious alarm, a patient risk, or a change above upper alarm limits.

### DISCUSSION

In this study, we quantified the number of auditory alarms that sounded during routine anesthesia monitoring, and assessed one aspect of alarm systems, the *specificity* of alarms—when an alarm sounded, what did it mean. We did not investigate the other aspect of alarm systems, the *sensitivity*—whether an alarm was sounding whenever a patient was in jeopardy.

Our results show that 75% of all auditory alarms during routine anesthesia monitoring did not originate from changes in the physiological variables for which the monitor was designed, and only 3% represented any patient risk. Similar findings have been reported from an Intensive Care Unit.<sup>1</sup> A common response to frequent false alarms is to disable them altogether.<sup>2,3</sup> Of the Canadian anesthetists surveyed by McIntyre,<sup>3</sup> 57% said they had deliberately inactivated an audible alarm, and the most common reason was too many false alarms. However, a study of breathing system disconnections reported that “the ease of disabling ventilator

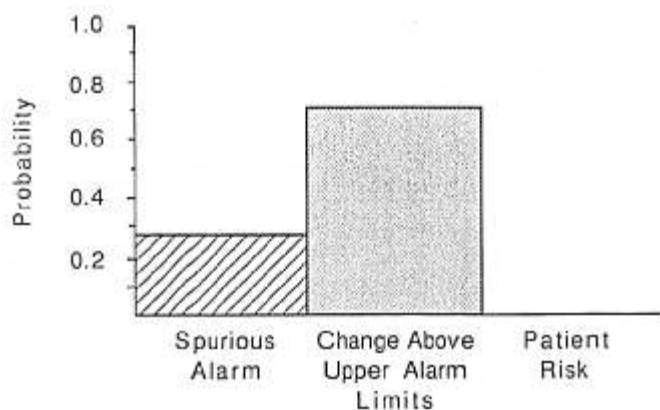

FIG. 5. The probability that a heart rate alarm on the pulse oximeter will be a spurious alarm, a patient risk, or a change above upper alarm limits.

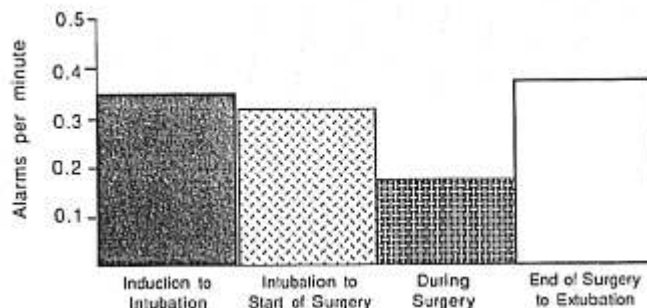

FIG. 6. The frequency of auditory alarms at various stages during anesthesia and surgery.

alarms either deliberately or inadvertently is overall the most important contributory factor in injuries.”<sup>14</sup>

Two sources of interference with proper functioning of the monitors in our study were interference from the electrocautery or operating room lights; both of these were causes of spurious alarms. The reverse situation has also been reported in which interference stopped an alarm from indicating a hazardous situation. Pulsatile signals from certain surgical lighting can mimic the physiological signal detected by the Nellcor pulse oximeter; one report cites a case in which this phenomena resulted in falsely high and acceptable oxygen saturations while the patient was actually cyanotic, due to unrecognized accidental tracheal extubation.<sup>5</sup>

Auditory alarms have their derivation from alarms that sound on submarines about to dive; most alarms emit a harsh, unpleasant noise. Manufacturers provide intrusive and aggressive alarms in an attempt to ensure that their equipment cannot be faulted for failing to alert the clinician to a deteriorating situation.<sup>6</sup> The Emergency Care Research Institute has published a series of recommendations for the manufacturer of alarms on monitors of *critical* variables. These include the inability to permanently silence the alarm, a visual as well as an auditory indication, and initial alarm limits at values likely to provide reasonable protection.<sup>5</sup> New alarm sounds have been proposed,<sup>7</sup> which would consist of a sequence of notes, similar to a segment of bird song. These sounds would be composed of at least four harmonics to aid localization, and would sound once and be followed by a period of silence of 20–30 s to avoid the

TABLE 3. Causes of Spurious Alarms

|                         | Patient Movement or Mechanical Problems | Interference from Electrocautery | Interference from Operating Room Lights |
|-------------------------|-----------------------------------------|----------------------------------|-----------------------------------------|
| Pulse oximeter          | 75%                                     | 23%                              | 2%                                      |
| Electrocardiogram       | 73%                                     | 27%                              |                                         |
| Arterial blood pressure | 100%                                    |                                  |                                         |

need to silence the alarm before searching for the cause. If the cause has not been remedied in this period, then the alarm is repeated, and urgency is indicated by an alarm that repeats its signal at faster speed and higher pitch, rather than louder. The total number of such sounds would be limited, since studies in civil aviation have shown diminished ability to recall the significance of more than seven sounds,<sup>7</sup> and pilots believe that all noncritical alarms should be silenced during high workload periods.<sup>8</sup>

Since heart rate, arterial blood pressure, and oxygenation are such fundamental aspects of patient care that anesthesiologists should be continually aware of these variables, it is questionable that these monitors actually need auditory alarms that are so often spurious. If these monitors are fitted with alarms, then the results of this study would suggest that the situation could be improved by using the newer type of alarm sounds outlined in the previous paragraph. This is in contrast to alarm devices such as disconnection alarms or inspired oxygen monitors, which rarely sound, but, when they do so, are likely to denote extreme patient hazard. With an integrated approach to monitoring and alarm systems as a whole, some alarms may be able to be omitted, with a reduction in the number of auditory alarms and an increase in their significance. Gaba *et al.*<sup>9</sup> stated that this approach needs to be validated, and alarms improved so that their benefits clearly outweigh their an-

noyance and potential confusion. The anesthesiologist's vigilance and ability to integrate information remains the most important source of patient monitoring. We conclude that there is an unacceptably high incidence of spurious alarms during routine anesthesia monitoring.

#### REFERENCES

1. O'Carroll TM: Survey of alarms in an intensive therapy unit. *Anaesthesia* 41:742-744, 1986
2. Sury MR, Hinds CJ, Bousted M: Accidental disconnection following inactivation of Serventilator alarm. *Anaesthesia* 41:91, 1986
3. McIntyre JWR: Ergonomics: Anaesthetists' use of auditory alarms in the operating room. *Int J Clin Monit Comput* 2:47-55, 1985
4. Cooper JB, Couvillon LA: Accidental breathing system disconnections, Interim Report to the Food and Drug Administration. Cambridge, Arthur D. Little Inc, 1983
5. Emergency Care Research Institute Health Devices. 16:39-44, 50-51, 1987
6. Hyman WA, Drinker PA: Design of medical device alarm systems. *Med Instrum* 17:103-106, 1983
7. Patterson R: Guidelines for auditory warning systems on civil aircraft, Civil Aviation Authority Report 82017. London, Department of Transport, 1982, 67
8. Veitergruber JE, Doucek GP, Smith WD: Aircraft alerting systems criteria study, Federal Aviation Authority Report FAA Rd-76-222. Washington, Federal Aviation Authority, 1977, 57
9. Gaba GM, Maxwell M, DeAnda A: Anesthetic mishaps: Breaking the chain of accident evolution. *ANESTHESIOLOGY* 66:670-676, 1987

Anesthesiology  
69:109-112, 1988

### Prevention of Hypokalemia during Axillary Nerve Block with 1% Lidocaine and Epinephrine 1:100,000

YOSHIRO TOYODA, M.D.,\* YUKIO KUBOTA, M.D.,† HIROSHI KUBOTA, M.D.,‡  
MASAHIRO MURAKAWA, M.D.,§ HIROYUKI ISHIDA, M.D.,¶ AKIRA ASADA, M.D.,\*\*  
MITSUGU FUJIMORI, M.D.,††

\* Associate Chief, Department of Anesthesia, Osaka Kohseinenkin Hospital; lecturer at Osaka City University.

† Chief, Department of Anesthesia, Osaka Kohseinenkin Hospital; lecturer at Kyoto University, Osaka City University, Osaka University Dental School, and Osaka Dental University.

‡ Staff, Department of Anesthesia, Osaka Kohseinenkin Hospital.

§ Assistant, Department of Anesthesiology, Kyoto University, Kyoto.

¶ Postdoctoral fellow, Department of Anesthesiology, Kyoto University, Kyoto.

\*\* Associate Professor, Department of Anesthesiology, Osaka City University, Osaka.

†† Professor and Chairman, Department of Anesthesiology, Osaka City University, Osaka.

We observed a patient in whom a decrease in amplitude of the T wave on the ECG occurred after axillary block with 1% lidocaine and 1:100,000 epinephrine with associated hypokalemia.

Received from the Department of Anesthesia, Osaka Kohseinenkin Hospital, Osaka, Japan. Accepted for publication January 19, 1988. Presented at the 33rd Annual Meeting of the Japan Society of Anesthesiology, April 10, 1986, Kyoto, Japan.

Address reprint requests to Dr. Y. Kubota: Osaka Kohseinenkin Hospital, 4-2-78, Fukushima, Fukushima-Ku, Osaka 553, Japan.

Key words: Anesthetics, local: lidocaine. Anesthetic techniques: axillary; regional. Ions: hypokalemia. Sympathetic nervous system: catecholamines; epinephrine.
